# Supplementary material for: Single-atom nanozymes
Source: PubMed Central journal article supplement — Sci Adv. 2019 May 3;5(5):eaav5490. doi: 10.1126/sciadv.aav5490 (PMC6499548; doi:10.1126/sciadv.aav5490), 2019-05-03
Supplement: aav5490_SM.pdf [file aav5490_SM.pdf]

## Supplementary Materials for Single-atom nanozymes

Liang Huang, Jinxing Chen, Linfeng Gan, Jin Wang\*, Shaojun Dong\*

\*Corresponding author. Email: jin.d.wang@gmail.com (J.W.); dongsj@ciac.ac.cn (S.D.)

Published 3 May 2019, *Sci. Adv.* **5**, eaav5490 (2019)

DOI: 10.1126/sciadv.aav5490

### This PDF file includes:

- Fig. S1. The structures of cytochrome P450, horseradish peroxidase, and catalase and the corresponding active center.
- Fig. S2. Morphology of the Zn-MOF precursor.
- Fig. S3. Structure of the Zn-MOF precursor.
- Fig. S4. FTIR spectra of FePc, Zn-MOF, and FePc@Zn-MOF.
- Fig. S5. Morphology and structure of FeN<sub>5</sub> SA/CNF.
- Fig. S6. Surface area and pore structure characterization.
- Fig. S7. HRTEM images of FeN<sub>5</sub> SA/CNF.
- Fig. S8. XPS and Mössbauer spectra of FeN<sub>5</sub> SA/CNF.
- Fig. S9. Morphology and atomic structure of FeN<sub>5</sub> SA/CNF@800°C.
- Fig. S10. Morphology and atomic structure of FeN<sub>5</sub> SA/CNF@1000°C.
- Fig. S11. Morphology and atomic structure of FeN<sub>4</sub> SA/CNF.
- Fig. S12. Morphology and atomic structure of MnN<sub>5</sub> SA/CNF.
- Fig. S13. Morphology and atomic structure of CoN<sub>5</sub> SA/CNF.
- Fig. S14. Morphology and atomic structure of NiN<sub>5</sub> SA/CNF.
- Fig. S15. Morphology and atomic structure of CuN<sub>5</sub> SA/CNF.
- Fig. S16. UV-vis absorption spectra of the catalysts.
- Fig. S17. Oxidase-like activities of FeN<sub>5</sub> SA/CNF in different conditions.
- Fig. S18. UV-vis absorption spectra of FeN<sub>5</sub> SA/CNF.
- Fig. S19. Morphology and structure of synthesized conventional nanozymes.
- Fig. S20. UV-vis absorption spectra of TMB solutions.
- Fig. S21. Morphological changes in bacteria.
- Fig. S22. In vitro cytotoxicity experiments.
- Fig. S23. Photographs of in vivo mice wound model.
- Fig. S24. Double-reciprocal plots of activity of these catalysts.
- Fig. S25. The analysis of the intermediate state of and active center in FeN<sub>5</sub> SA/CNF.
- Fig. S26. Theoretical investigation of oxidase-like activity.
- Table S1. Mössbauer parameters of FeN<sub>5</sub> SA/CNF.
- Table S2. Comparison of oxidase-like activity of synthesized catalysts.

Table S3. Comparison of the kinetic constants of the single-atom enzyme mimics.  
Table S4. The adsorption energy on the single-atom catalysts.  
Table S5. Reaction free energy of intermediate species on single-atom catalysts.  
Table S6. Comparison of the kinetic constants of FeN<sub>5</sub> SA/CNF and nanozymes.  
References (44–51)

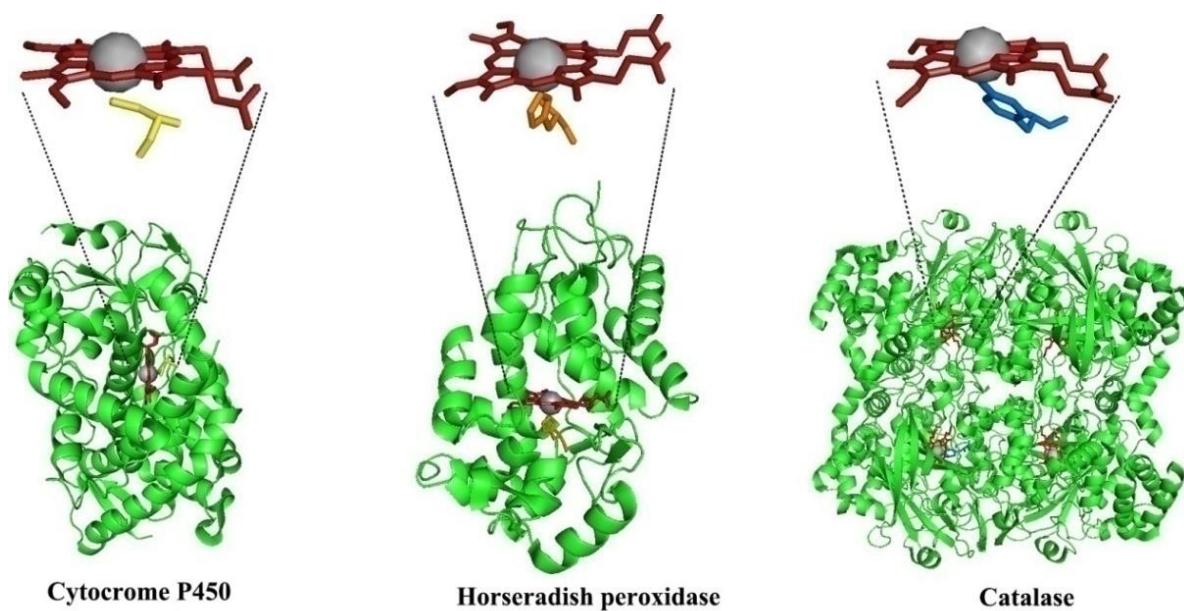

**Fig. S1. The structures of cytocrome P450, horseradish peroxidase, and catalase and the corresponding active center.** The active centers of these enzymes are heme coordinate with axial ligands of thiolate (cysteine), imidazole (histidine) and phenolic hydroxy (tyrosine), respectively.

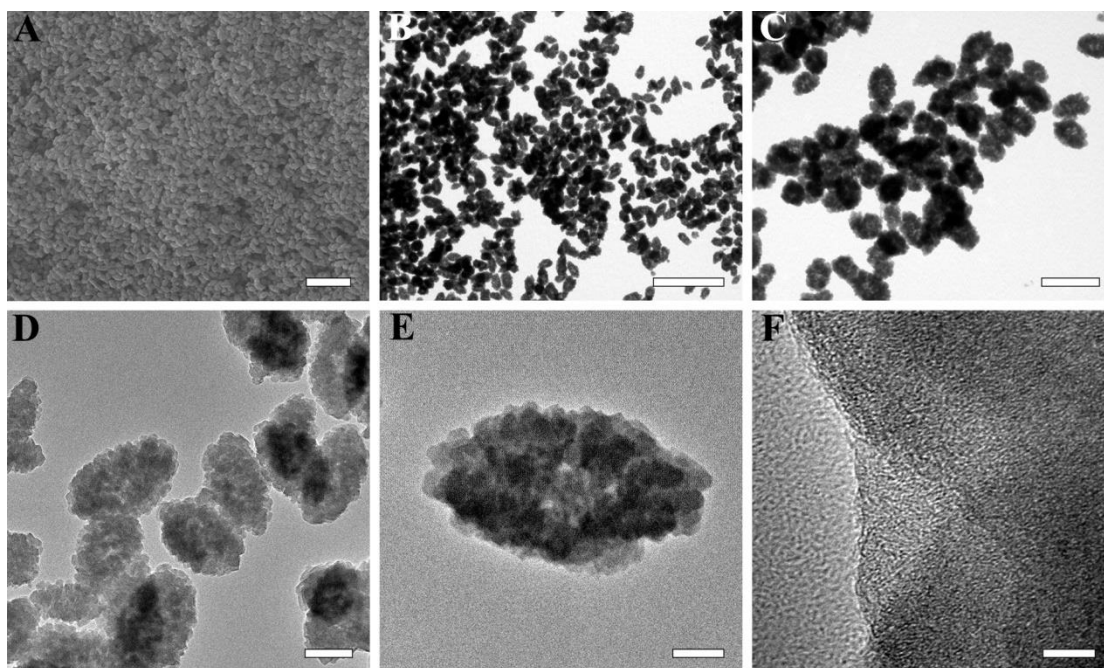

**Fig. S2. Morphology of the Zn-MOF precursor.** (A) SEM image and (B) TEM image of Zn-MOF. (C, D) TEM images and (E, F) HRTEM images of FePc@Zn-MOF. The scale bar in (A) 2  $\mu\text{m}$ , (B) 2  $\mu\text{m}$ , (C) 500 nm, (D) 200 nm, (E) 100 nm, (F) 5 nm.

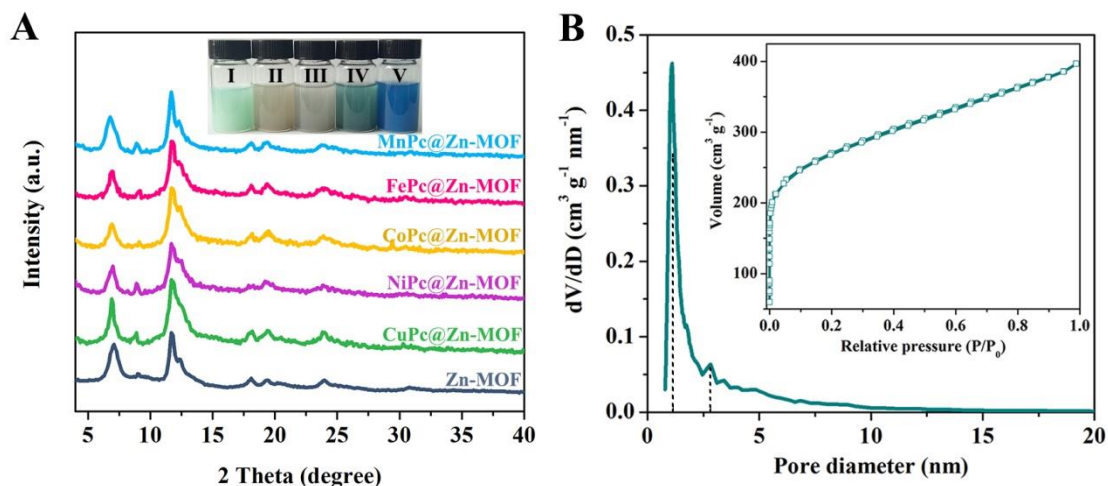

**Fig. S3. Structure of the Zn-MOF precursor.** (A) XRD pattern of MnPc@Zn-MOF (I), FePc@Zn-MOF (II), CoPc@Zn-MOF (III), NiPc@Zn-MOF (IV), CuPc@Zn-MOF (V) and Zn-MOF. Inset is the optical image of the corresponding MPC@Zn-MOF in ethanol solution ( $10 \text{ mg mL}^{-1}$ ). (Photo Credit: Liang Huang, Changchun Institute of Applied Chemistry) (B) Pore size distribution of FePc@Zn-MOF, and the inset of (B) is the corresponding  $\text{N}_2$  adsorption/desorption isotherms.

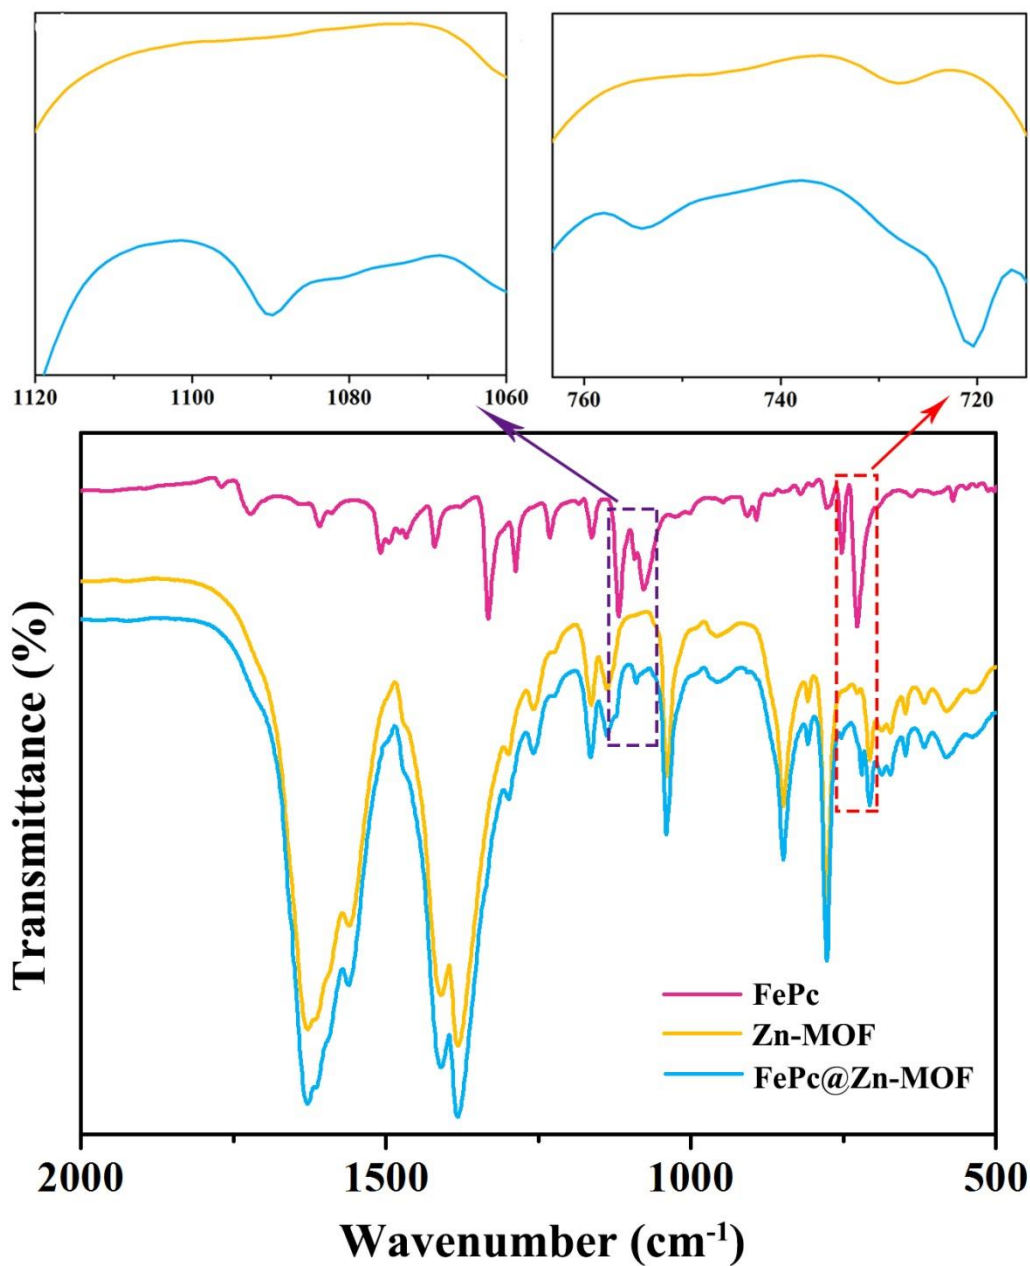

**Fig. S4. FTIR spectra of FePc, Zn-MOF, and FePc@Zn-MOF.** The intensity of the peaks in FePc@Zn-MOF at 1090 cm<sup>-1</sup> (top left), 754 cm<sup>-1</sup> and 721 cm<sup>-1</sup> (top right) ascribed to the characteristic peaks of FePc indicated by dashed boxes.

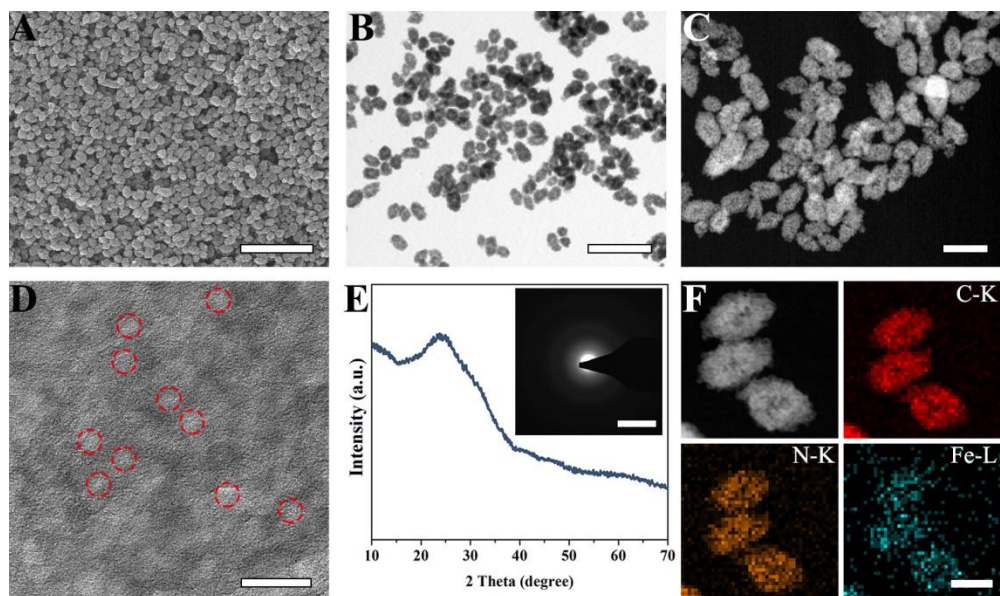

**Fig. S5. Morphology and structure of FeN<sub>5</sub> SA/CNF.** (A) SEM image, (B) TEM image, (C) STEM image, (D) HRTEM image, (E) XRD pattern and (F) TEM-EDS elemental mapping images of FeN<sub>5</sub> SA/CNF. The porous structure in (D) is indicated by circles. The inset of (E) is corresponding SAED pattern. The scale bar in (A) 2  $\mu\text{m}$ , (B) 1  $\mu\text{m}$ , (C) 500 nm, (D) 20 nm, inset (E) 5  $\text{nm}^{-1}$ , (F) 200 nm.

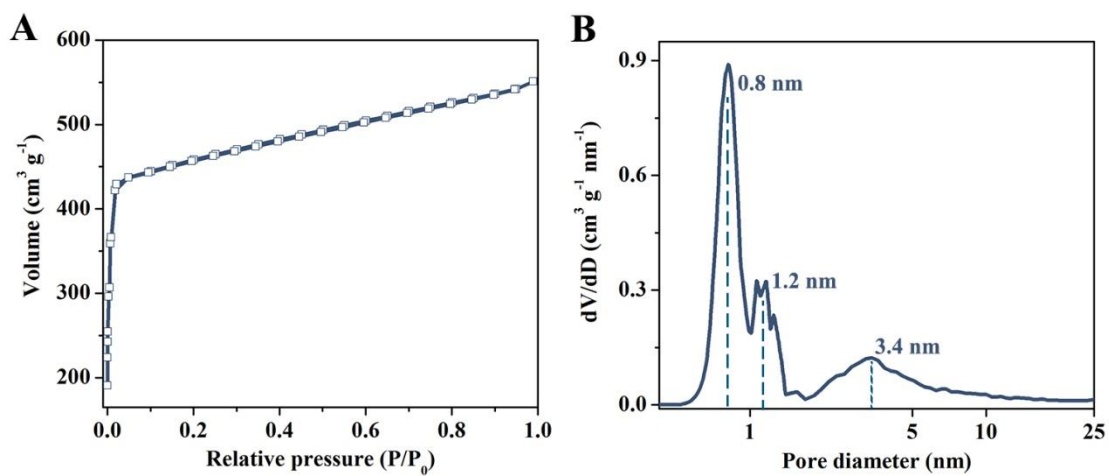

**Fig. S6. Surface area and pore structure characterization.** (A) N<sub>2</sub> adsorption/desorption isotherms and (B) pore size distribution of FeN<sub>5</sub> SA/CNF.

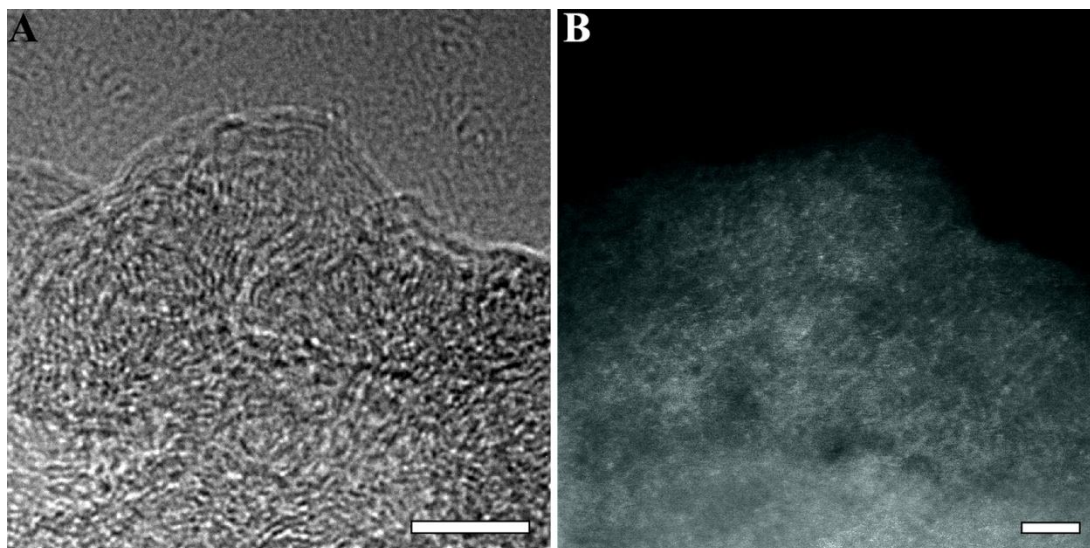

**Fig. S7. HRTEM images of FeN<sub>5</sub> SA/CNF.** (A) HRTEM image and (B) HAADF-STEM image of FeN<sub>5</sub> SA/CNF. The scale bar in (A) 5 nm, (B) 2 nm.



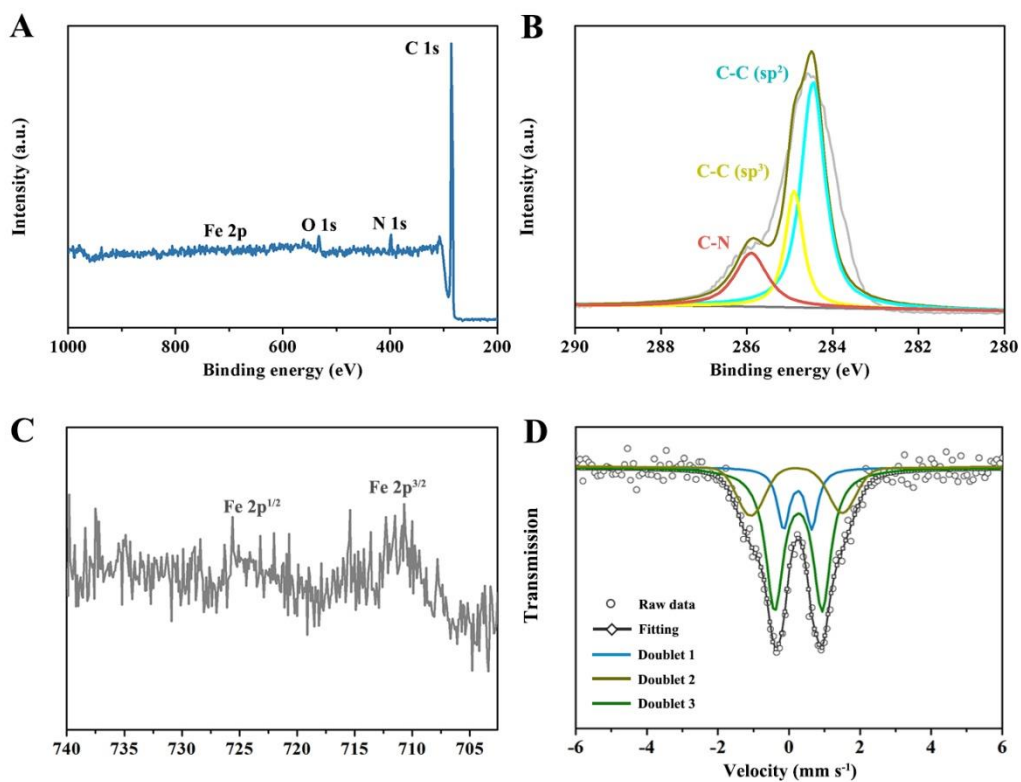

**Fig. S8. XPS and Mössbauer spectra of FeN<sub>5</sub> SA/CNF.** (A) XPS spectrum of FeN<sub>5</sub> SA/CNF, and the corresponding high resolution XPS spectra of (B) C 1s and (C) Fe 2p. (D) <sup>57</sup>Fe Mössbauer spectrum of FeN<sub>5</sub> SA/CNF.

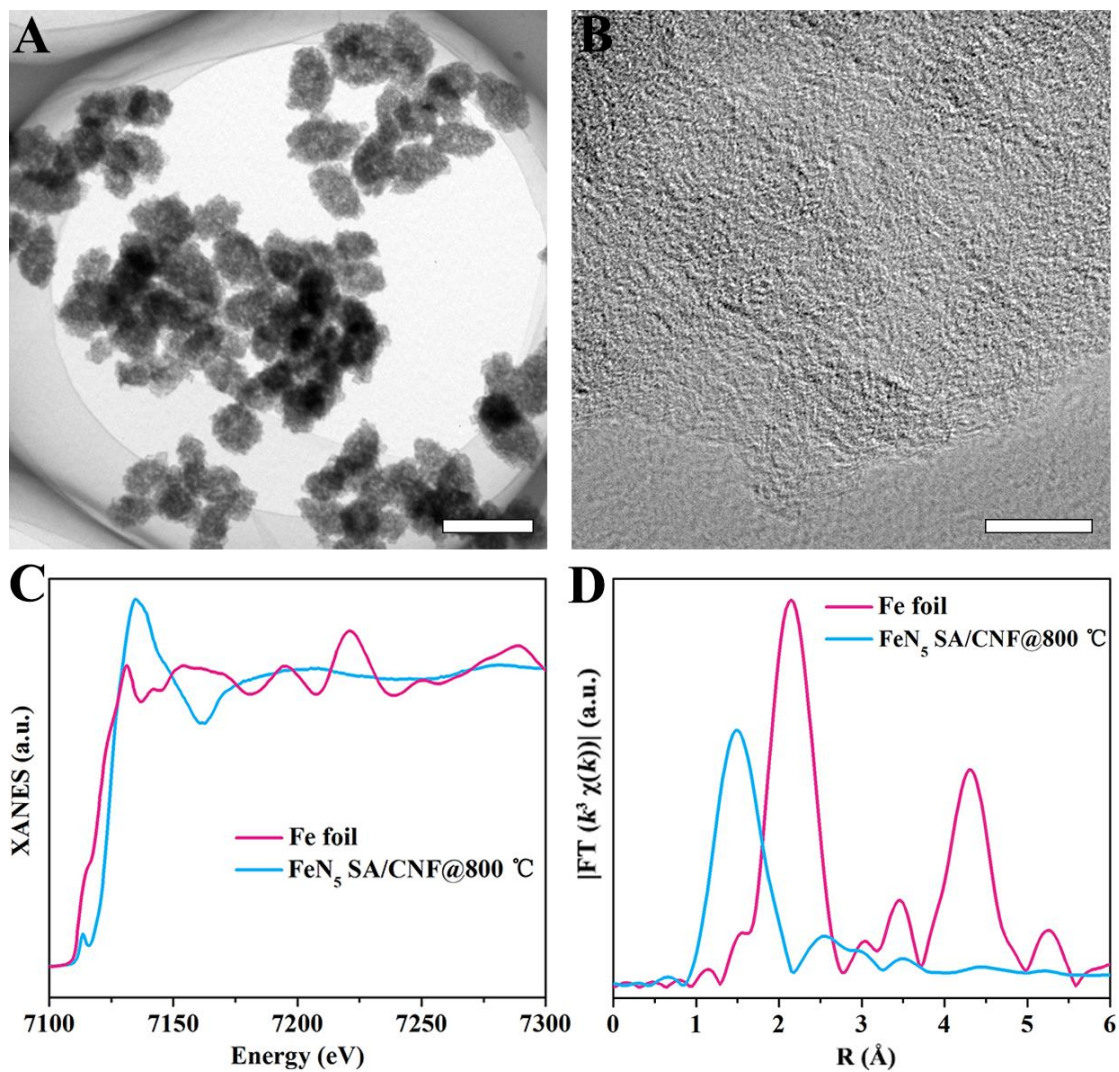

**Fig. S9. Morphology and atomic structure of FeN<sub>5</sub> SA/CNF@800°C.** (A) TEM image and (B) HRTEM image of FeN<sub>5</sub> SA/CNF@800°C. (C) Normalized XANES spectra at Fe K-edge of the Fe foil and FeN<sub>5</sub> SA/CNF@800°C, and the corresponding (D) k<sup>3</sup>-weighted Fourier transform spectra. The scale bar in (A) 500 nm, (B) 5 nm.

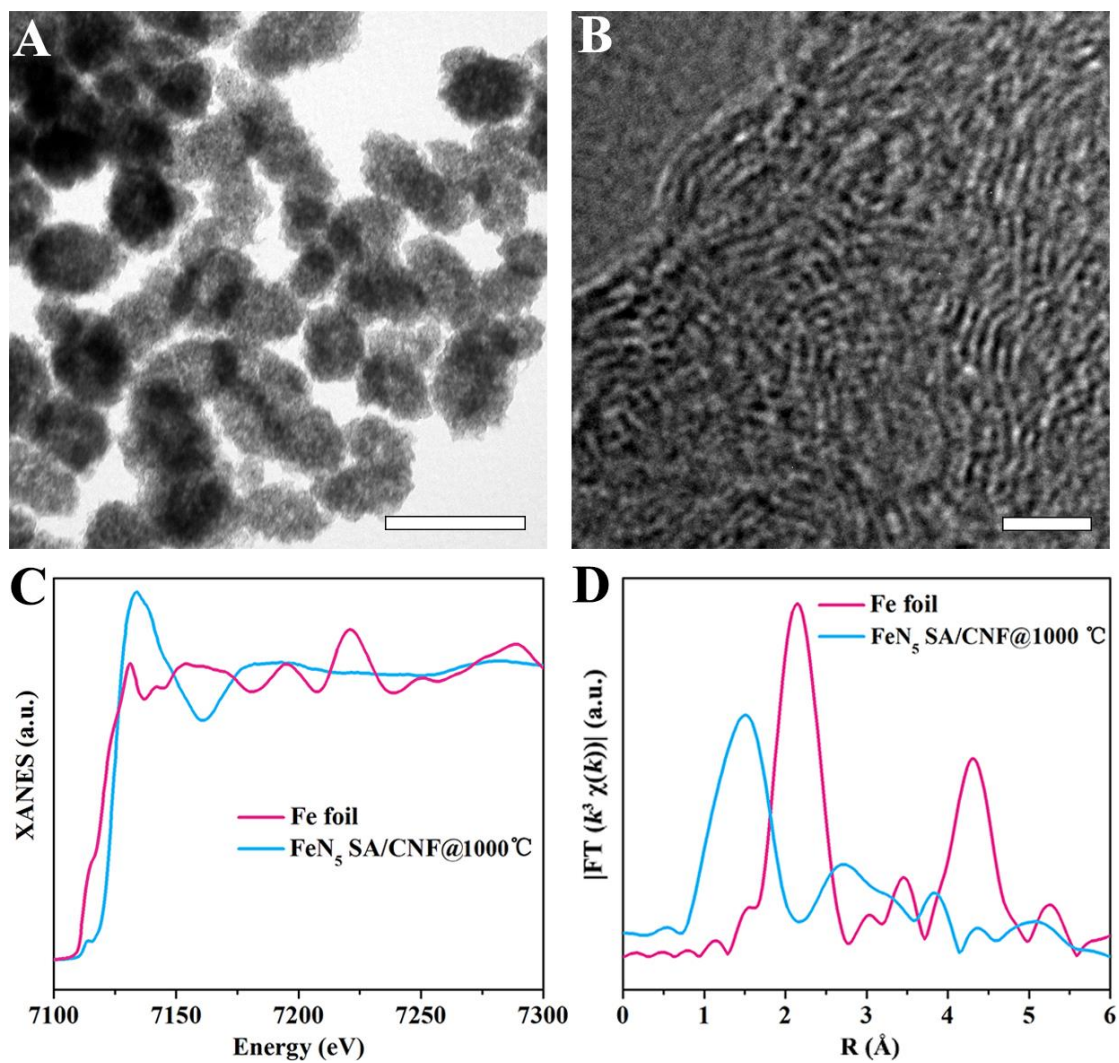

**Fig. S10. Morphology and atomic structure of FeN<sub>5</sub> SA/CNF@1000°C.** (A) TEM image and (B) HRTEM image of FeN<sub>5</sub> SA/CNF@1000 °C. (C) Normalized XANES spectra at Fe K-edge of the Fe foil and FeN<sub>5</sub> SA/CNF@1000°C, and the corresponding (D) k<sup>3</sup>-weighted Fourier transform spectra. The scale bar in (A) 500 nm, (B) 2 nm.

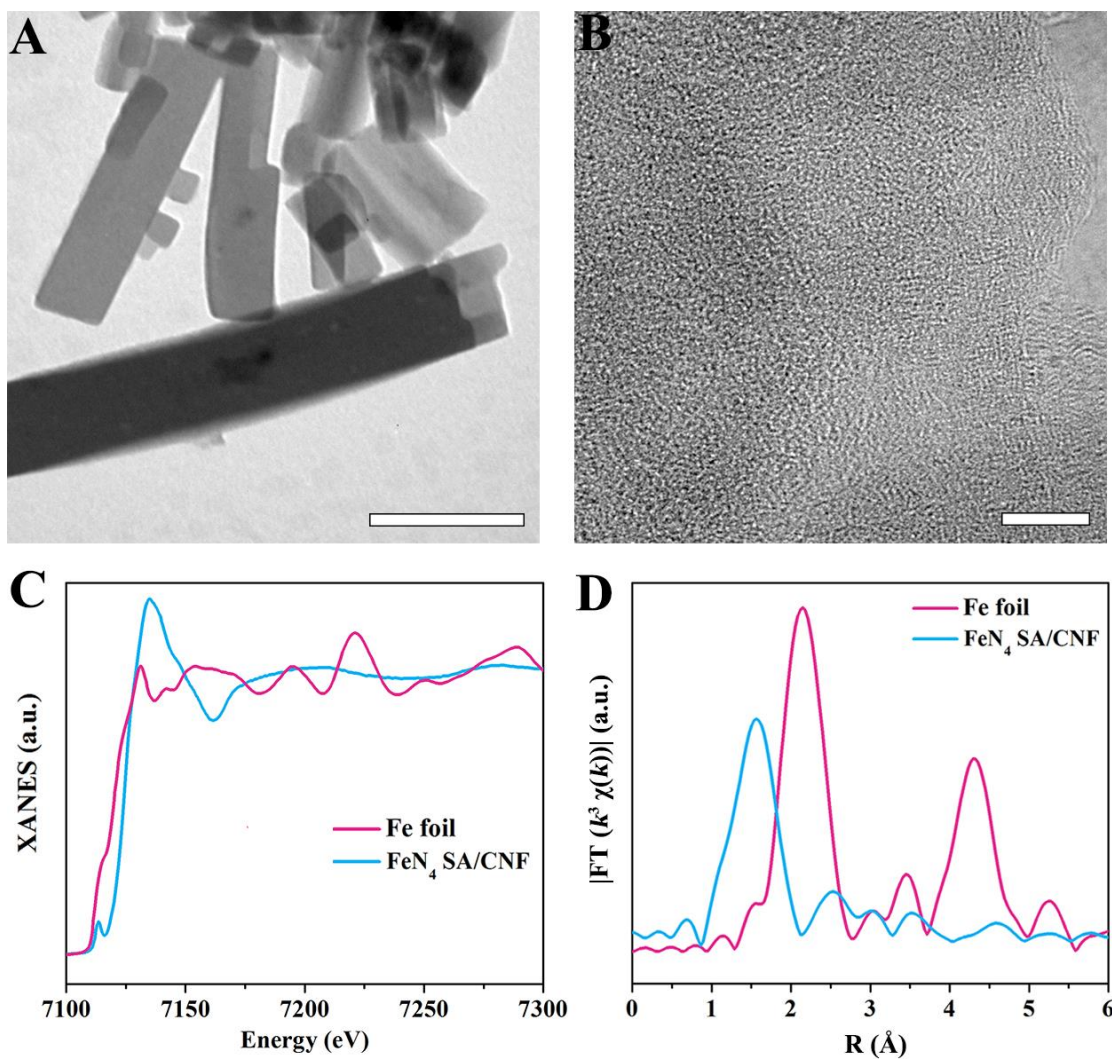

**Fig. S11. Morphology and atomic structure of FeN<sub>4</sub> SA/CNF.** (A) TEM image and (B) HRTEM image of FeN<sub>4</sub> SA/CNF. (C) Normalized XANES spectra at Fe K-edge of the Fe foil and FeN<sub>4</sub> SA/CNF, and the corresponding (D) k<sup>3</sup>-weighted Fourier transform spectra. The scale bar in (A) 500 nm, (B) 5 nm.

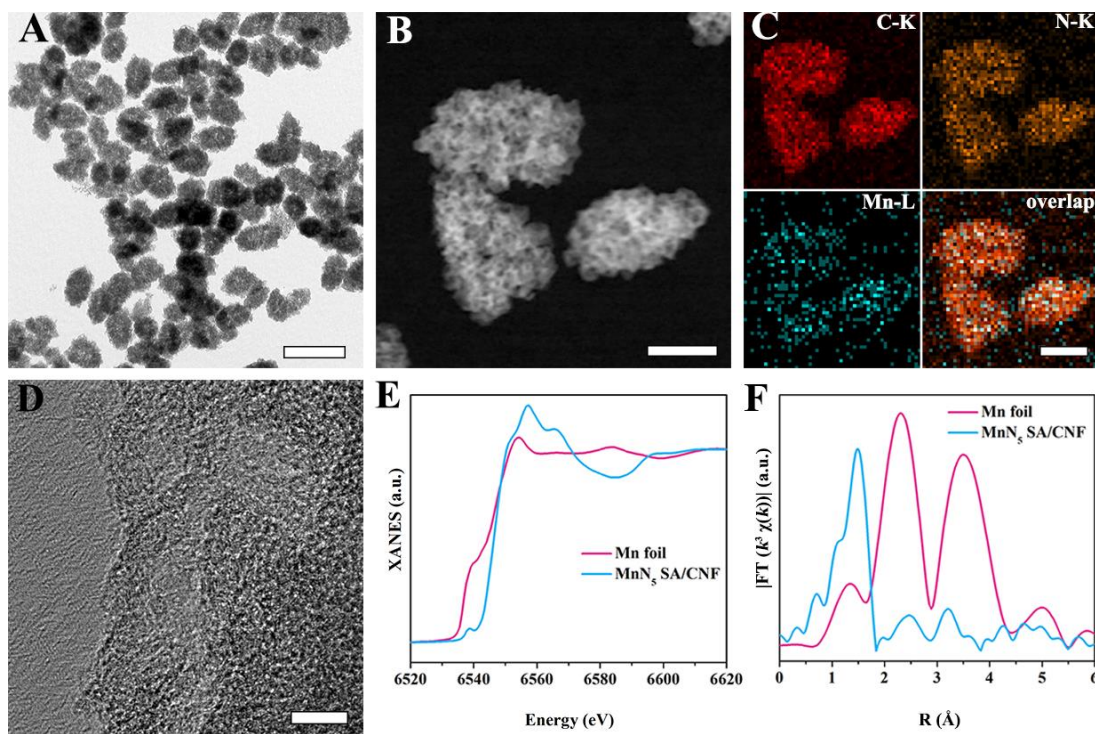

**Fig. S12. Morphology and atomic structure of MnN<sub>5</sub> SA/CNF.** (A) TEM image, (B) HAADF-STEM image, (C) TEM-EDS elemental mapping images and (D) HRTEM image of MnN<sub>5</sub> SA/CNF. (E) Normalized XANES spectra at Mn K-edge of the Mn foil and MnN<sub>5</sub> SA/CNF, and the corresponding (F) k<sup>3</sup>-weighted Fourier transform spectra. The scale bar in (A) 500 nm, (B) 200 nm, (C) 200 nm and (D) 5 nm.

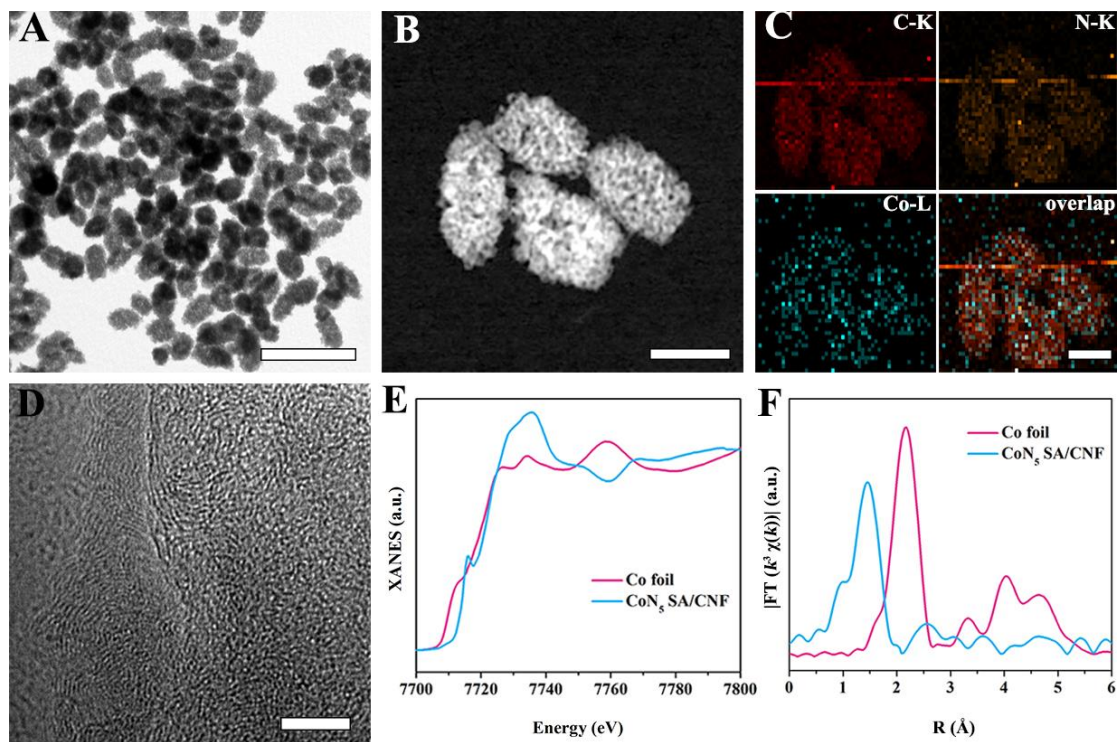

**Fig. S13. Morphology and atomic structure of CoN<sub>5</sub> SA/CNF.** (A) TEM image, (B) HAADF-STEM image, (C) TEM-EDS elemental mapping images and (D) HRTEM image of CoN<sub>5</sub> SA/CNF. (E) Normalized XANES spectra at Co K-edge of the Co foil and CoN<sub>5</sub> SA/CNF, and the corresponding (F)  $k^3$ -weighted Fourier transform spectra. The scale bar in (A) 1  $\mu\text{m}$ , (B) 200 nm, (C) 200 nm and (D) 5 nm.

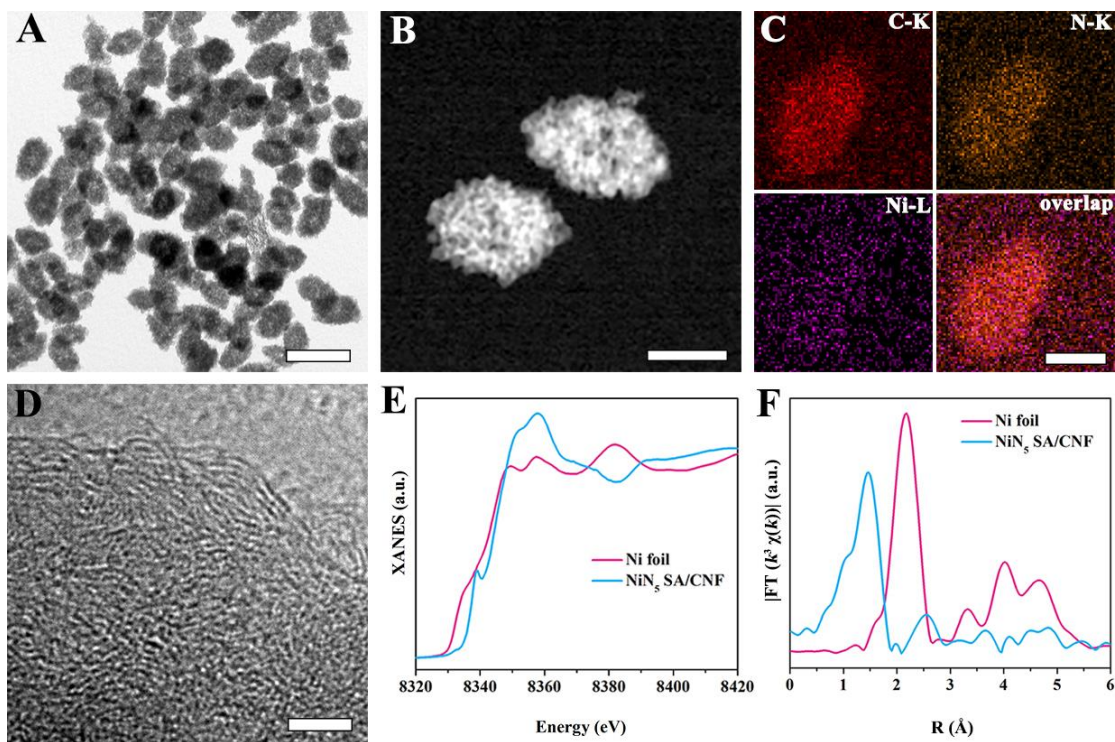

**Fig. S14. Morphology and atomic structure of NiN<sub>5</sub> SA/CNF.** (A) TEM image, (B) HAADF-STEM image, (C) TEM-EDS elemental mapping images and (D) HRTEM image of NiN<sub>5</sub> SA/CNF. (E) Normalized XANES spectra at Ni K-edge of the Ni foil and NiN<sub>5</sub> SA/CNF, and the corresponding (F) k<sup>3</sup>-weighted Fourier transform spectra. The scale bar in (A) 500 nm, (B) 200 nm, (C) 200 nm and (D) 3 nm.

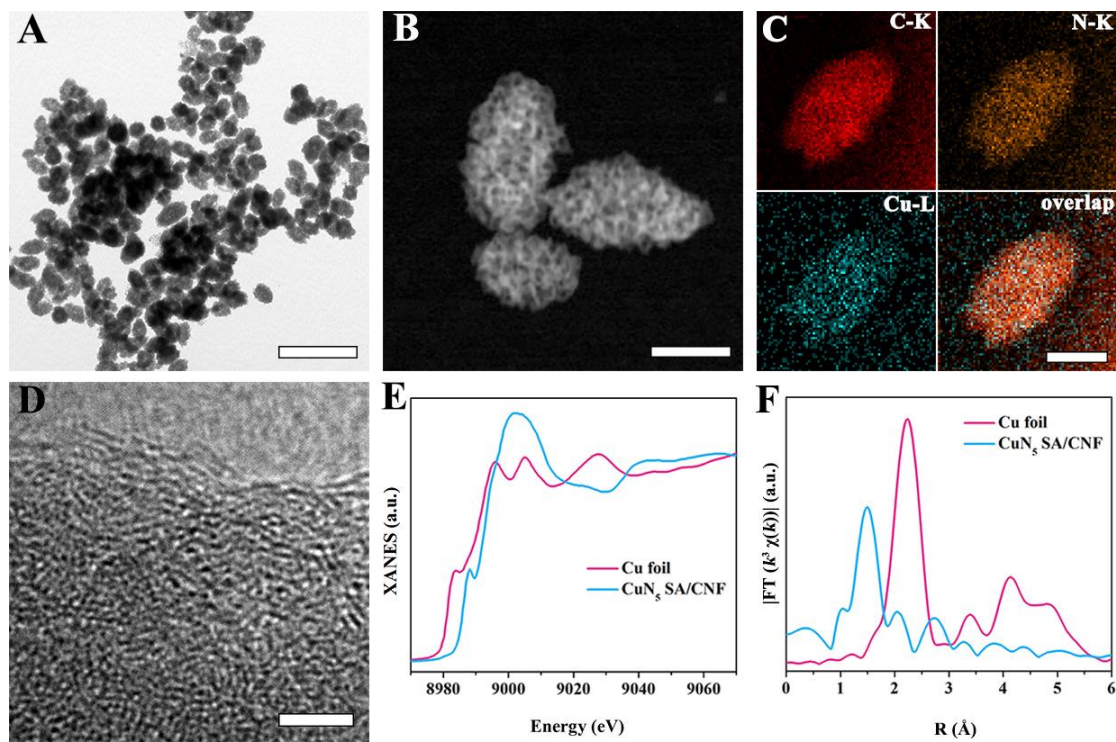

**Fig. S15. Morphology and atomic structure of  $\text{CuN}_5$  SA/CNF.** (A) TEM image, (B) HAADF-STEM image, (C) TEM-EDS elemental mapping images and (D) HRTEM image of  $\text{CuN}_5$  SA/CNF. (E) Normalized XANES spectra at Cu K-edge of the Cu foil and  $\text{CuN}_5$  SA/CNF, and the corresponding (F)  $k^3$ -weighted Fourier transform spectra. The scale bar in (A) 1  $\mu\text{m}$ , (B) 200 nm, (C) 200 nm and (D) 3 nm.



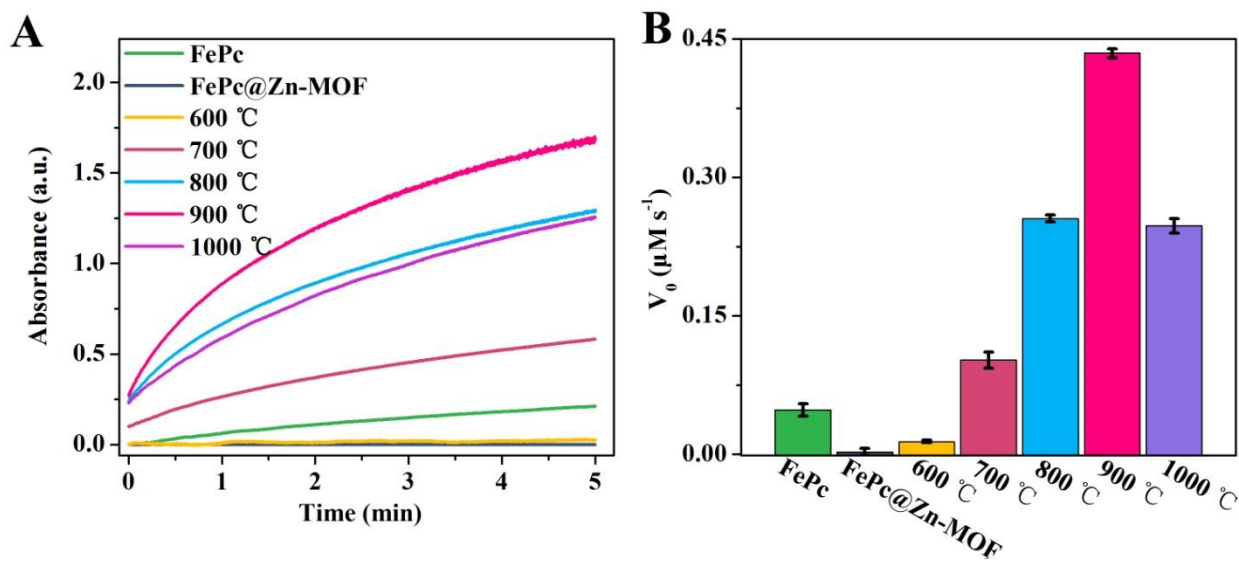

**Fig. S16. UV-vis absorption spectra of the catalysts.** (A) Time-dependent absorbance changes at 652 nm in the presence of FePc, FePc@Zn-MOF and FeN<sub>5</sub> SA/CNF obtained at different pyrolysis temperature (600°C~1000°C), and (B) the oxidase-like activity histogram of the corresponding catalysts.

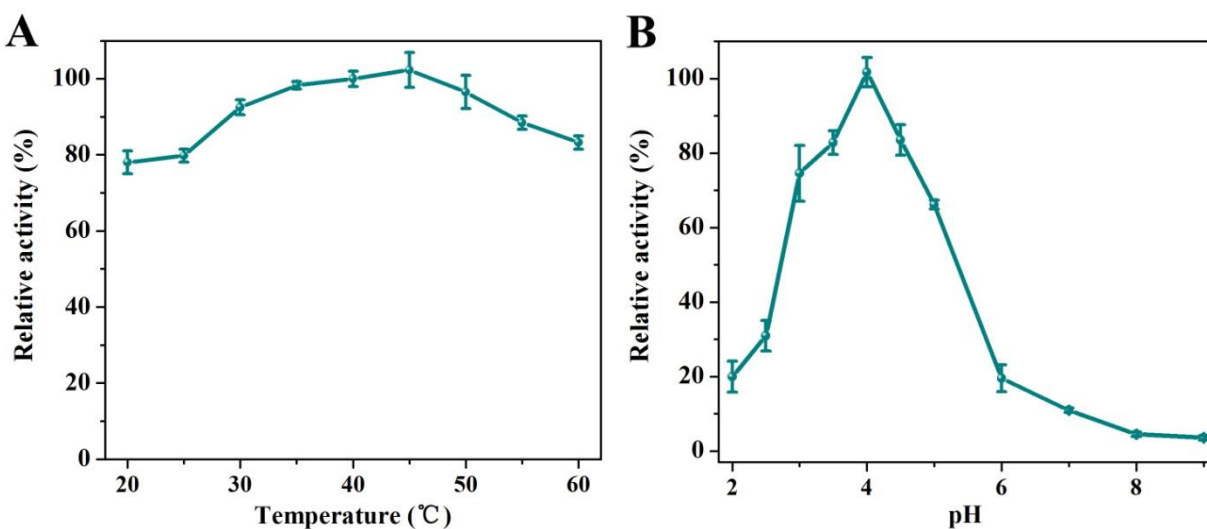

**Fig. S17. Oxidase-like activities of FeN<sub>5</sub> SA/CNF in different conditions.** (A) Temperature-dependent and (B) pH-dependent absorbance changes at 652 nm by using FeN<sub>5</sub> SA/CNF as oxidase mimics.

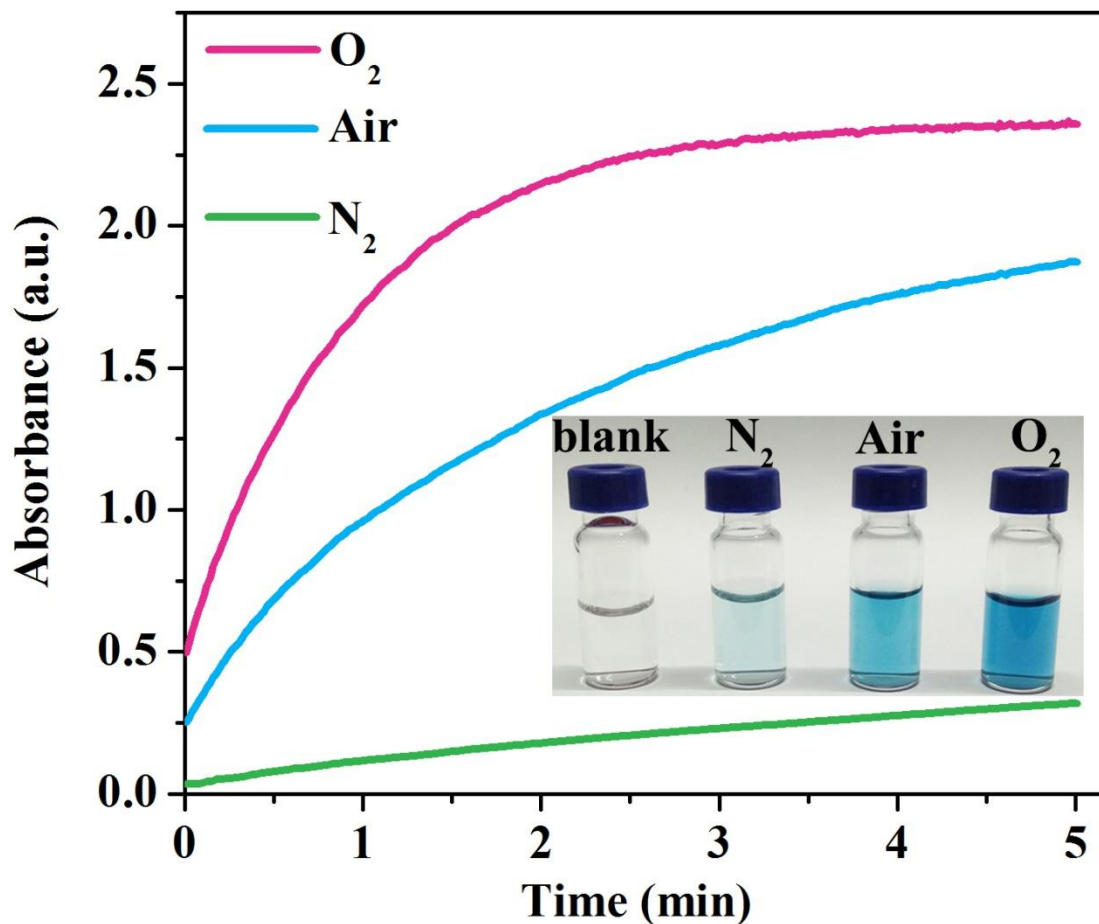

**Fig. S18. UV-vis absorption spectra of FeN<sub>5</sub> SA/CNF.** Time-dependent absorbance changes at 652 nm in the presence of FeN<sub>5</sub> SA/CNF in O<sub>2</sub>- saturated, Air- saturated and N<sub>2</sub>- saturated sodium acetate-acetic acid buffer, and the inset is an optical image of the corresponding TMB solution catalyzed by FeN<sub>5</sub> SA/CNF at 1 min. (Photo Credit: Liang Huang, Changchun Institute of Applied Chemistry)

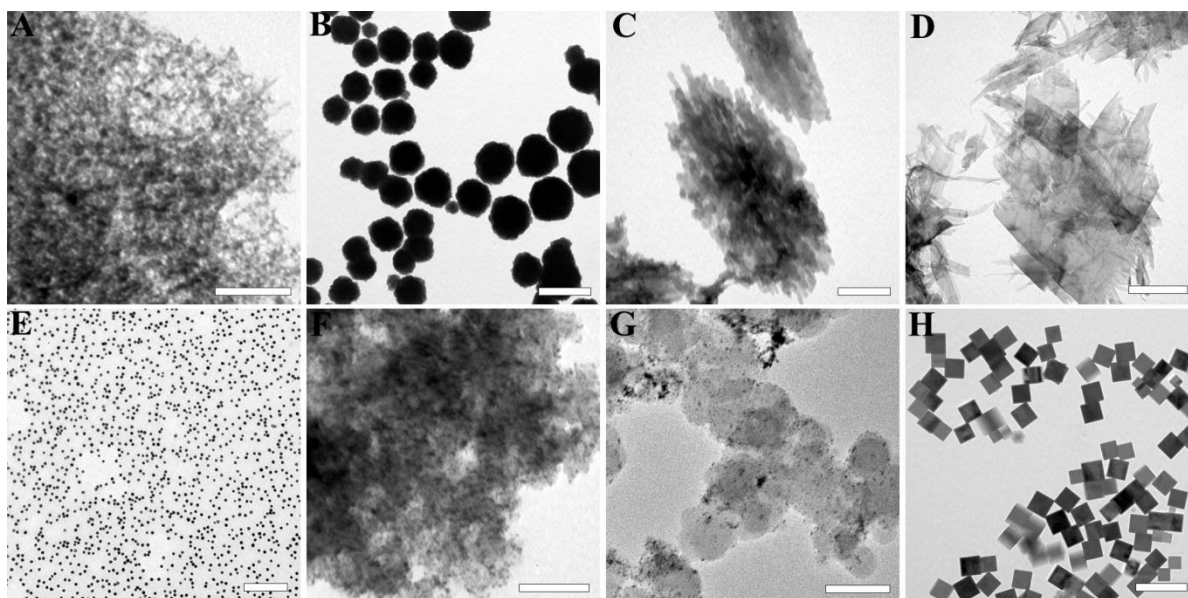

**Fig. S19. Morphology and structure of synthesized conventional nanozymes.** (A)  $\text{MnO}_2$ , (B)  $\text{Fe}_3\text{O}_4$ , (C)  $\text{CeO}_2$ , (D)  $\text{CuO}$ , (E) Au, (F) Commercial Pd/C (40%), (G) Commercial Pt/C (20%) and (H) PB. The scale bars are 100 nm, 500 nm, 200 nm, 200nm, 200 nm, 100 nm, 100 nm and 200 nm, respectively.

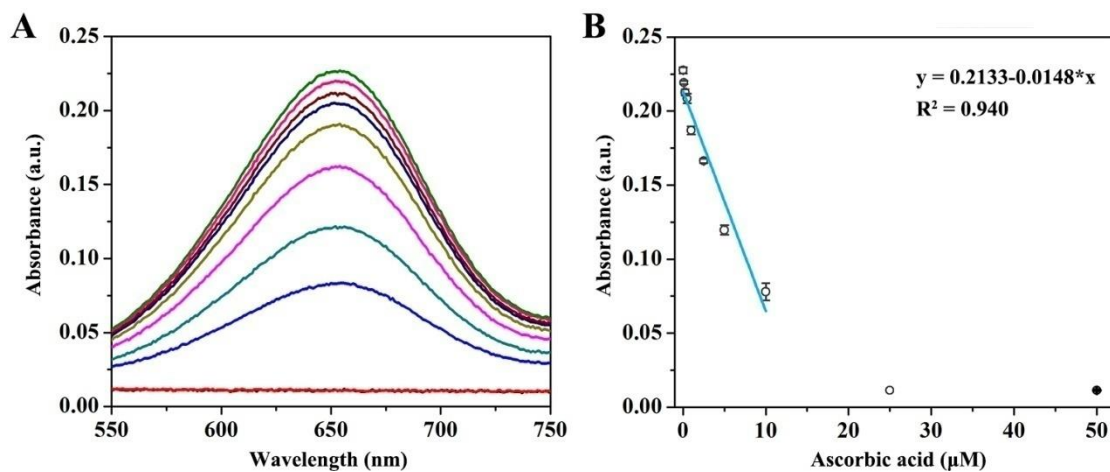

**Fig. S20. UV-vis absorption spectra of TMB solutions.** (A) UV-Vis absorption spectra of TMB solutions containing FeN<sub>5</sub> SA/CNF upon the addition of AA (0~50 μM). (B) Dose-response curve for AA detection at 652 nm, the error bars represent the standard deviation of four measurements. The inhibitive effect of TMB oxidation reaction by ascorbic acid (AA) makes the FeN<sub>5</sub> SA/CNF sensitive to the antioxidant. The oxidation rate of TMB gradually decrease with the increase of AA concentration, and there is a good linear relationship between the absorbance of oxTMB and AA concentration in the range of 0.1-10 μM with a limit of detection of 0.07 μM.

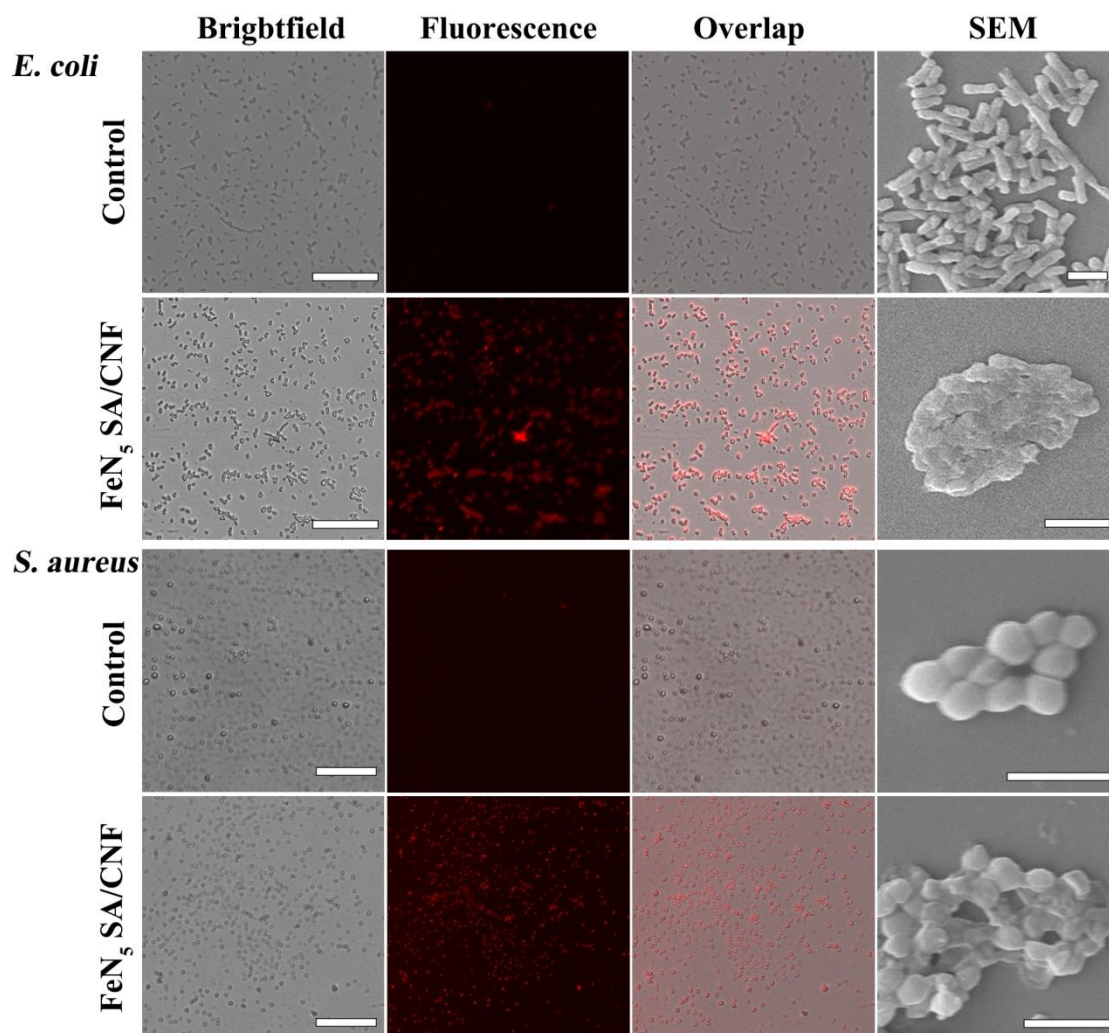

**Fig. S21. Morphological changes in bacteria.** Brightfield images, Fluorescence images, overlap images and SEM images of *E. coli* and *S. aureus* bacteria treated or untreated with FeN<sub>5</sub> SA/CNF. The scale bars are 40 μm for fluorescence images and 2 μm for SEM images.

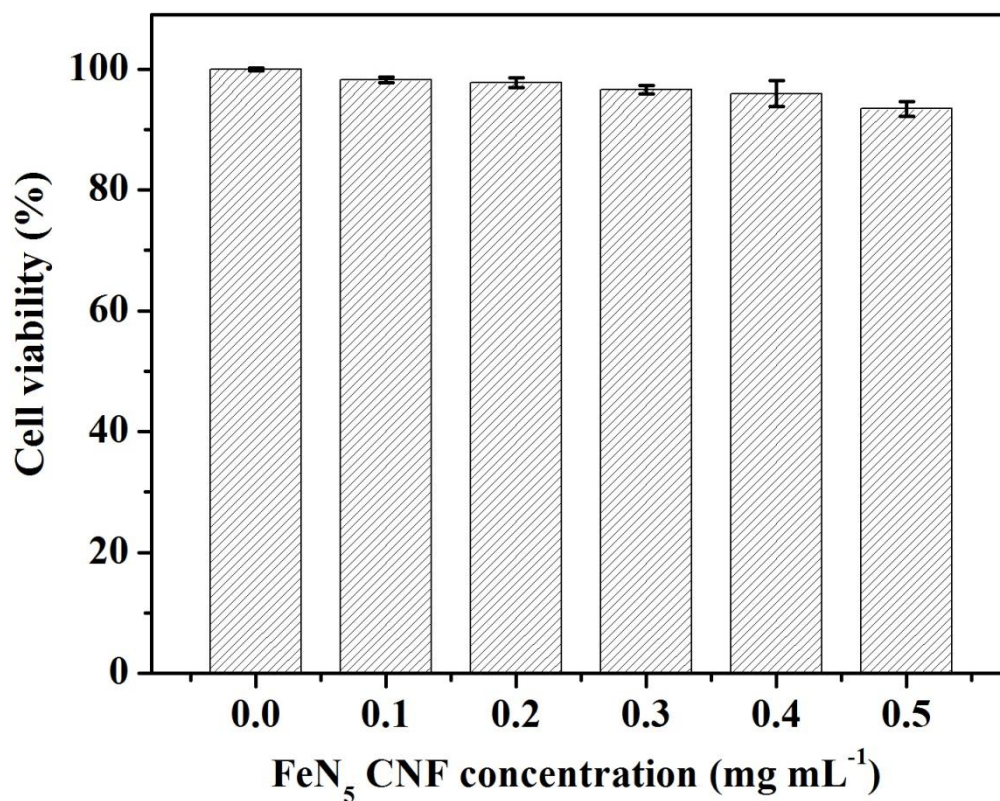

**Fig. S22. In vitro cytotoxicity experiments.** Cell viability of NCM460 cells after incubation with FeN<sub>5</sub> CNF at various concentrations (0–0.5 mg mL<sup>-1</sup>) for 24 h. Values of surviving fraction are the means and standard deviation from three parallel experiments (n=8).

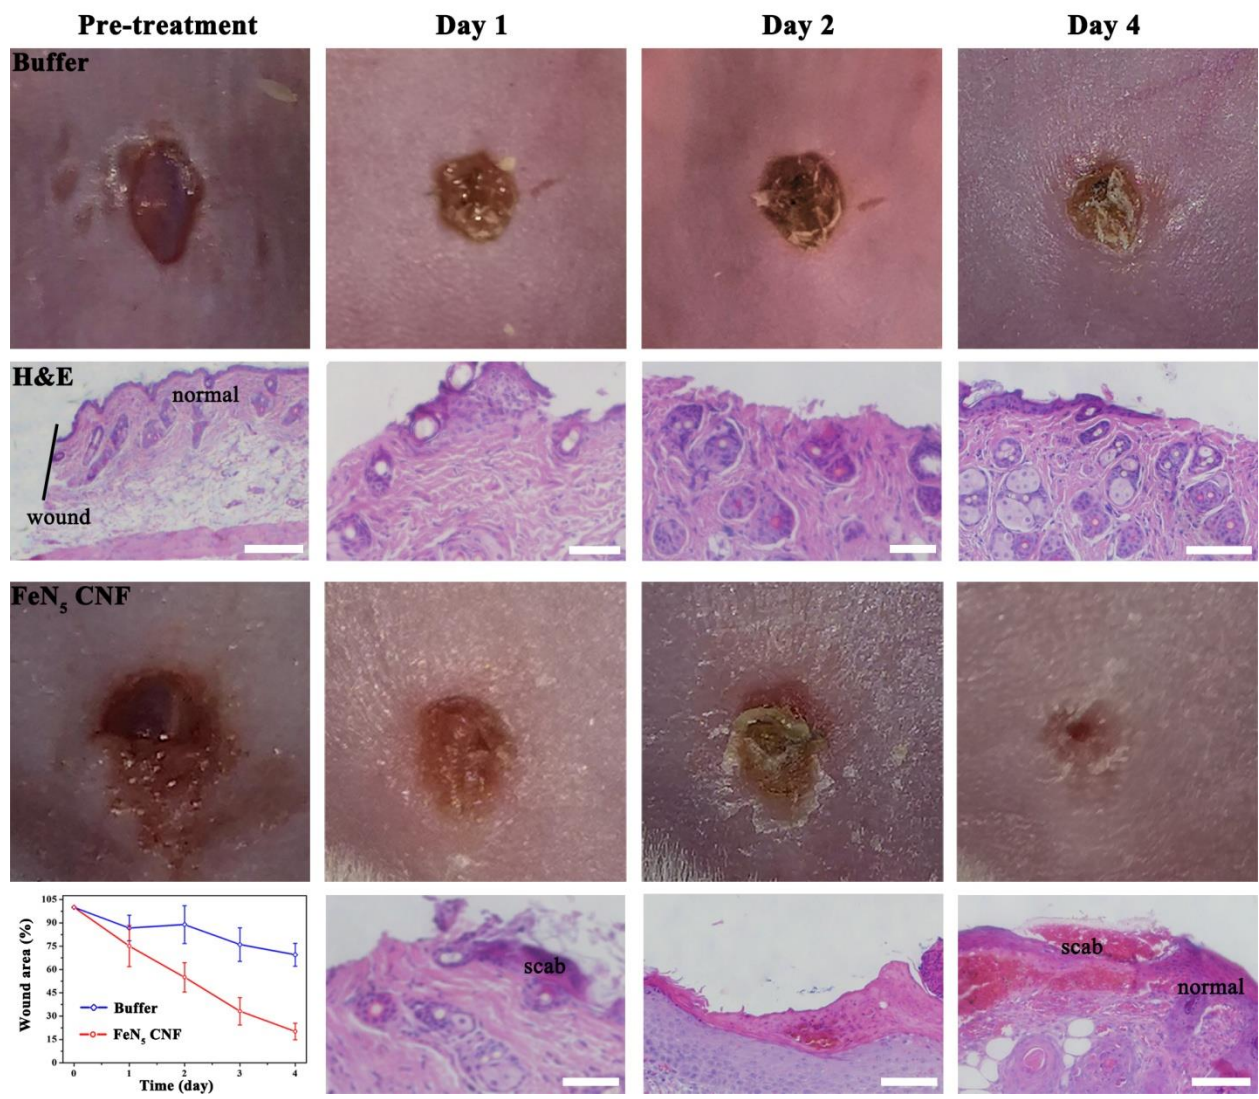

**Fig. S23. Photographs of in vivo mice wound model.** Photographs of *E. coli* infected wound treated with PBS buffer and FeN<sub>5</sub> CNF solutions at pre-treatment, the first day, the second day and the fourth day, and their corresponding histologic analyses. (Five mice in each group). Related wound size of mice in each group after different treatments (diagram in the left corner). Error bars are taken from three mice per group. The scale bars are 200  $\mu\text{m}$ , 50  $\mu\text{m}$ , 50  $\mu\text{m}$ , 100  $\mu\text{m}$ , 50  $\mu\text{m}$ , 100  $\mu\text{m}$  and 100  $\mu\text{m}$  for the H&E staining images (from left to right), respectively. (Photo Credit: Liang Huang, Changchun Institute of Applied Chemistry)

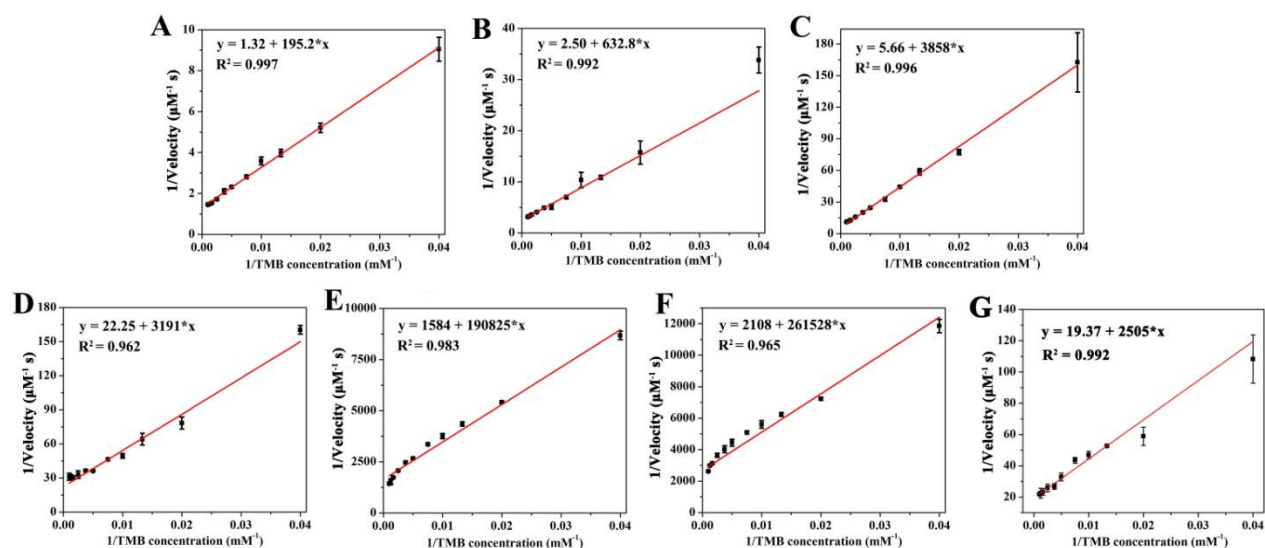

**Fig. S24. Double-reciprocal plots of activity of these catalysts. (A) FeN<sub>5</sub> SA/CNF, (B) MnN<sub>5</sub> SA/CNF, (C) CoN<sub>5</sub> SA/CNF, (D) FeN<sub>4</sub> SA/CNF, (E) NiN<sub>5</sub> SA/CNF, (F) CuN<sub>5</sub> SA/CNF and (G) commercial Pt/C. The error bars represent the standard deviation of four measurements.**

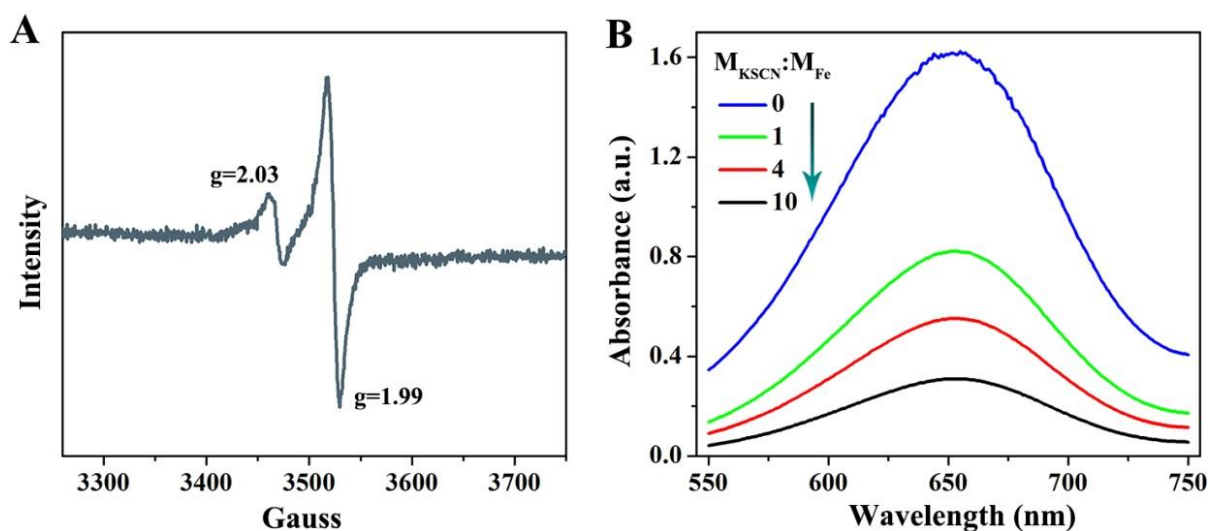

**Fig. S25. The analysis of the intermediate state of and active center in FeN<sub>5</sub> SA/CNF. (A) X-band EPR spectrum of FeN<sub>5</sub> SA/CNF in acetonitrile/ PhIO at 77 K. Experimental conditions: frequency, 9.853 GHz; microwave power, 10.8 mW; center field, 3510 G; modulation amplitude, 10 G; time constant, 1.250 ms. (B) UV-Vis absorption spectra of TMB solutions containing FeN<sub>5</sub> SA/CNF upon the addition of KSCN (molar ratio of KSCN:Fe, 0~10).**



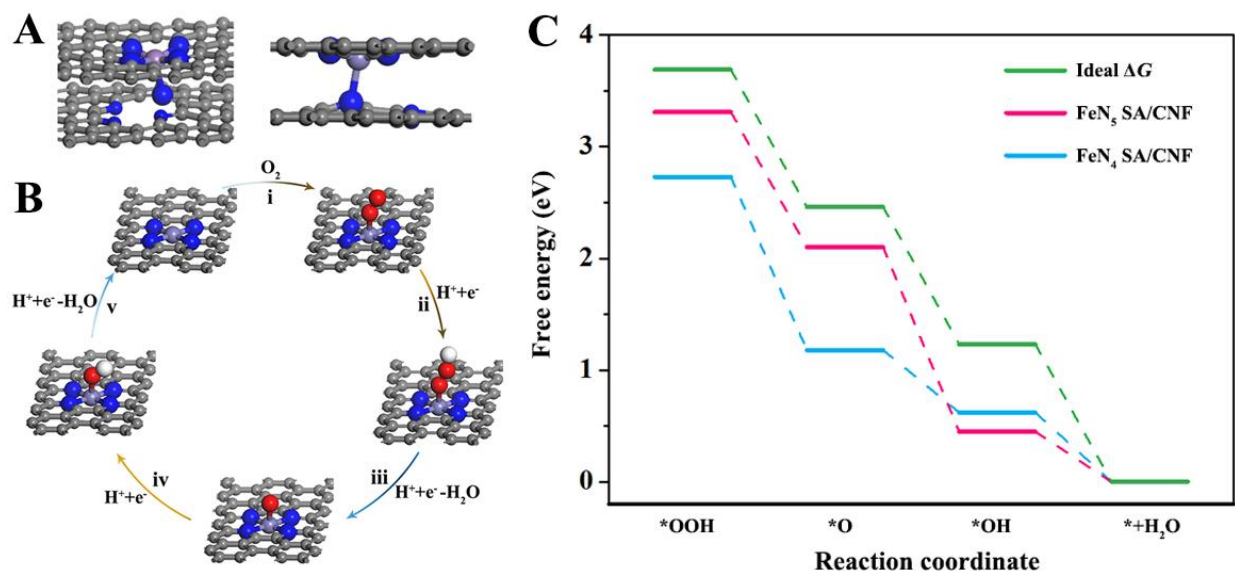

**Fig. S26. Theoretical investigation of oxidase-like activity.** (A) Top view and side view of FeN<sub>5</sub> SA/CNF theoretical model. (B) Proposed reaction pathways of O<sub>2</sub> reduction to H<sub>2</sub>O with optimized adsorption configurations on FeN<sub>4</sub> SA/CNF. The gray, blue, purple, red and white balls represent the C, N, Fe, O, H atoms, respectively. (C) Free energy diagram of intermediate species on FeN<sub>4</sub> SA/CNF and FeN<sub>5</sub> SA/CNF compared with ideal  $\Delta G$ .

**Table S1. Mössbauer parameters of FeN<sub>5</sub> SA/CNF.**

| Doublet | $\delta_{iso}/ \text{mm s}^{-1}$ | $\Delta E_Q/ \text{mm s}^{-1}$ | Area/ % |
|---------|----------------------------------|--------------------------------|---------|
| D1      | 0.24                             | 0.82                           | 58.57   |
| D2      | 0.13                             | 2.75                           | 24.65   |
| D3      | 0.26                             | 1.34                           | 16.78   |

**Table S2. Comparison of oxidase-like activity of synthesized catalysts.**

| Catalysts                                | MnO <sub>2</sub> | Fe <sub>3</sub> O <sub>4</sub> | CeO <sub>2</sub> | CuO    | Au     | Pd/C   | Pt/C   | PB     |
|------------------------------------------|------------------|--------------------------------|------------------|--------|--------|--------|--------|--------|
| $v_0/\mu\text{M s}^{-1}$                 | 0.0496           | 0.0009                         | 0.0036           | 0.0001 | 0.0011 | 0.0038 | 0.0454 | 0.0002 |
| [E]/ $\mu\text{M}$                       | 57.47            | 64.66                          | 29.07            | 62.89  | 25.38  | 18.86  | 5.13   | 35.71  |
| $k_{\text{cat}}'/10^{-3} \text{ s}^{-1}$ | 0.863            | 0.014                          | 0.124            | 0.002  | 0.043  | 0.201  | 8.850  | 0.006  |

$k_{\text{cat}}'$  is the catalytic constant, which is normalized the initial reaction velocity with [E] at standard conditions (air-saturated 0.4 mM TMB solution),  $k_{\text{cat}}' = v_0/[E]$ , [E] is the molar concentration of metal in nanozymes.

**Table S3. Comparison of the kinetic constants of the single-atom enzyme mimics.**

| Catalysts               | $K_m$<br>(mM) | $v_{\text{max}}$<br>( $\mu\text{M s}^{-1}$ ) | $k_{\text{cat}}$<br>( $10^{-1} \text{ s}^{-1}$ ) | $k_{\text{cat}}/K_m$<br>( $\text{mM}^{-1} \text{ s}^{-1}$ ) |
|-------------------------|---------------|----------------------------------------------|--------------------------------------------------|-------------------------------------------------------------|
| FeN <sub>5</sub> SA/CNF | 0.148         | 0.758                                        | 7.084                                            | 4.787                                                       |
| MnN <sub>5</sub> SA/CNF | 0.253         | 0.400                                        | 3.740                                            | 1.478                                                       |
| CoN <sub>5</sub> SA/CNF | 0.682         | 0.177                                        | 1.743                                            | 0.256                                                       |
| FeN <sub>4</sub> SA/CNF | 0.143         | 0.045                                        | 0.421                                            | 0.296                                                       |
| NiN <sub>5</sub> SA/CNF | 0.120         | $6 \times 10^{-4}$                           | 0.006                                            | 0.005                                                       |
| CuN <sub>5</sub> SA/CNF | 0.124         | $4.7 \times 10^{-4}$                         | 0.005                                            | 0.004                                                       |
| Commercial Pt/C         | 0.129         | 0.052                                        | 0.101                                            | 0.079                                                       |

$K_m$  is the Michaelis constant,  $v_{\text{max}}$  is the maximal reaction velocity and  $k_{\text{cat}}$  is the catalytic constant, where  $k_{\text{cat}} = v_{\text{max}}/[E]$ , [E] is the molar concentration of metal in nanozymes.

**Table S4. The adsorption energy on the single-atom catalysts.**

| Free energy (eV)        | $\Delta G_{*O_2}$ | $\Delta G_{*O_2-*OOH}$ |
|-------------------------|-------------------|------------------------|
| FeN <sub>4</sub> SA/CNF | 0.05              | 2.19                   |
| CoN <sub>5</sub> SA/CNF | 0.45              | 0.85                   |
| MnN <sub>5</sub> SA/CNF | 0.39              | 0.73                   |
| FeN <sub>5</sub> SA/CNF | 0.79              | 0.82                   |

**Table S5. Reaction free energy of intermediate species on single-atom catalysts.**

| Free energy (eV) | FeN <sub>4</sub> SA/CNF | CoN <sub>5</sub> SA/CNF | MnN <sub>5</sub> SA/CNF | FeN <sub>5</sub> SA/CNF |
|------------------|-------------------------|-------------------------|-------------------------|-------------------------|
| *O <sub>2</sub>  | 4.87                    | 4.47                    | 4.53                    | 4.13                    |
| *OOH             | 2.73                    | 3.62                    | 3.80                    | 3.31                    |
| *O               | 1.18                    | 2.87                    | 2.18                    | 2.10                    |
| *OH              | 0.62                    | 0.72                    | 0.75                    | 0.45                    |

**Table S6. Comparison of the kinetic constants of FeN<sub>5</sub> SA/CNF and nanozymes.**

| Catalysts                                       | $K_m$<br>(mM) | $v_{max}$<br>( $\mu\text{M s}^{-1}$ ) | $k_{cat}$<br>( $10^{-1} \text{ s}^{-1}$ ) | $k_{cat}/K_m$<br>( $\text{mM}^{-1} \text{ s}^{-1}$ ) | Ref       |
|-------------------------------------------------|---------------|---------------------------------------|-------------------------------------------|------------------------------------------------------|-----------|
| FeN <sub>5</sub> SA/CNF                         | 0.148         | 0.758                                 | 7.08                                      | 4.786                                                | This work |
| Nano-CeO <sub>2</sub>                           | 0.420         | 0.100                                 | 0.02                                      | 0.005                                                | (44)      |
| Ce-MOF <sup>a</sup>                             | 0.088         | 0.110                                 | 0.013                                     | 0.011                                                | (45)      |
| Mn <sub>3</sub> O <sub>4</sub> NPs <sup>b</sup> | 0.025         | 0.051                                 | 0.005                                     | 0.0204                                               | (46)      |
| Co <sub>3</sub> Fe LCC-LDH <sup>c</sup>         | 0.050         | 0.387                                 | 0.013                                     | 0.0267                                               | (47)      |
| Fe/NC-800                                       | 0.170         | 0.089                                 | 0.002                                     | 0.0012                                               | (48)      |
| Au@HCNs <sup>d</sup>                            | 0.170         | 0.049                                 | 0.043                                     | 0.0256                                               | (49)      |
| MSN-AuNPs <sup>e</sup>                          | 0.225         | 0.118                                 | 0.297                                     | 0.132                                                | (34)      |
| Ru NPs                                          | 54.92         | 0.010                                 | $2 \times 10^{-4}$                        | $3.5 \times 10^{-7}$                                 | (50)      |
| Pt NPs                                          | 0.051         | 0.109                                 | 0.072                                     | 0.141                                                | (51)      |
| N-PCNSs-5 <sup>f</sup>                          | 0.095         | 0.003                                 | –                                         | –                                                    | (7)       |

$K_m$  is the Michaelis constant,  $v_{max}$  is the maximal reaction velocity and  $k_{cat}$  is the catalytic constant, where  $k_{cat} = v_{max}/[E]$ ,  $[E]$  is the molar concentration of metal in nanozymes.

<sup>a</sup> MOF: Metal-organic framework; <sup>b</sup> NPs: Nanoparticles;

<sup>c</sup> LCC-LDH: Lyotropic liquid crystals -layered double hydroxides;

<sup>d</sup> HCNs: Hollow carbon nanospheres; <sup>e</sup> MSN: Mesoporous silica;

<sup>f</sup> N-PCNSs: N-doped porous carbon nanospheres.
